# Supplementary material for: OLego: fast and sensitive mapping of spliced mRNA-Seq reads using small seeds
Source: PubMed Central journal article supplement — Nucleic Acids Res. 2013 Apr 8;41(10):5149–63. doi: 10.1093/nar/gkt216 (PMC3664805; doi:10.1093/nar/gkt216), 2013-04-08
Supplement: supp_gkt216_nar-02806-n-2012-File009.pdf [file supp_gkt216_nar-02806-n-2012-File009.pdf]

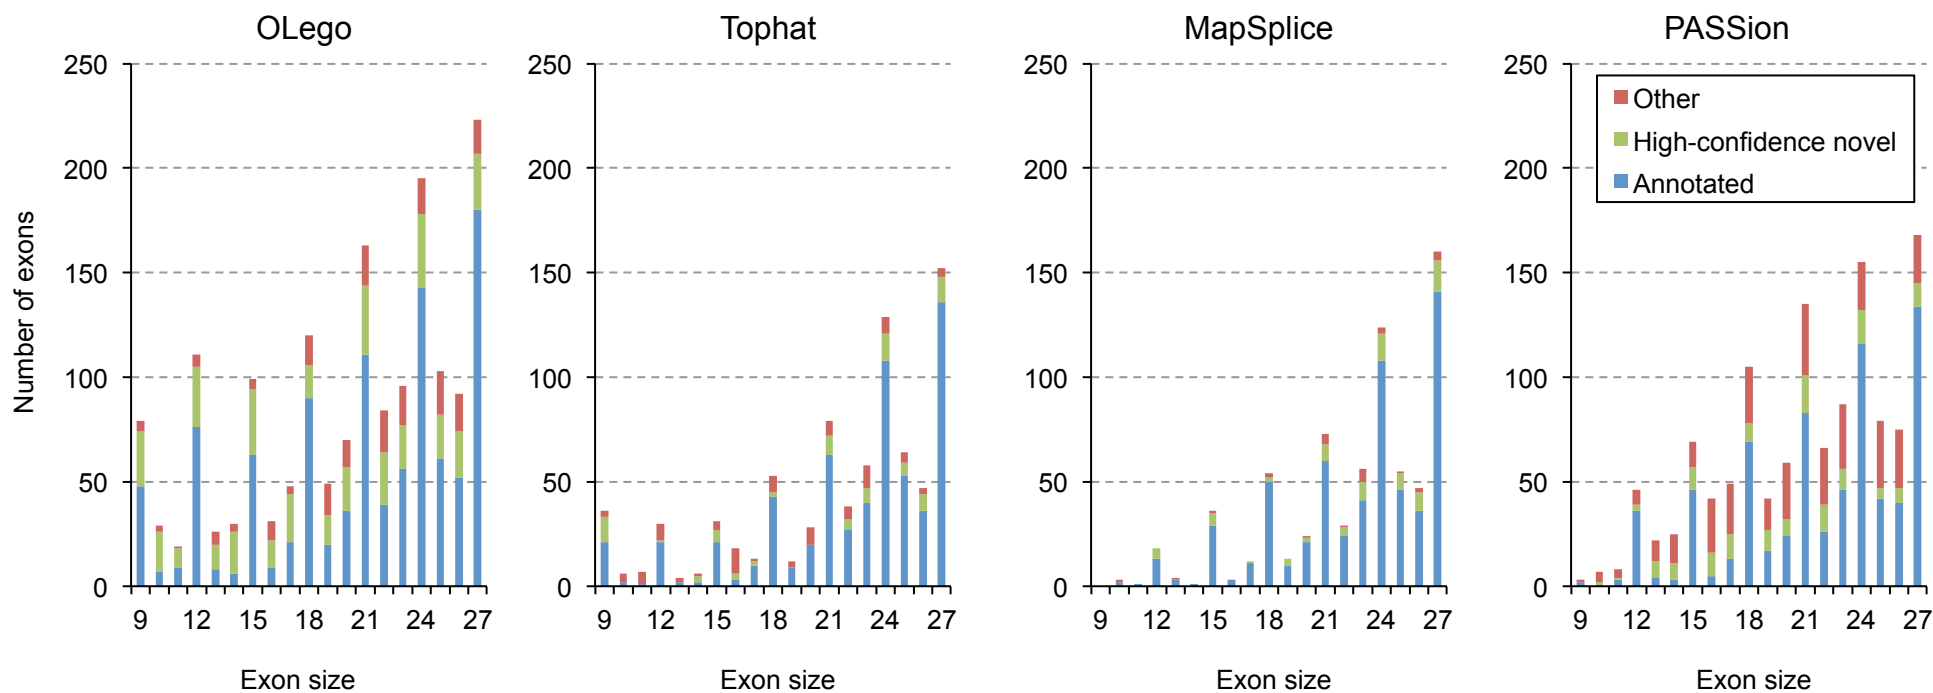

**Supplementary Figure 1:** Number of micro-exons identified by OLEgo and the other three programs.

Exons are binned by their sizes (9~27nt), and in each bin, they are classified into three groups: annotated micro-exons in previous gene models (blue), high-confidence novel micro-exons (exons with both flanking constitutive splice sites annotated; green), and other exons (red).

**Supplementary Figure 2: UCSC genome browser screenshots of the validated micro-exons.**

Structures of the inclusion and exclusion isoforms are shown in the user supplied track. The number of supporting reads is indicated to the left of each isoform. Known transcript structures ( UCSC genes, RefSeq genes and ESTs ) are also shown in the screenshots. The micro-exons are in the same order as they are listed in Supplementary Table 2.

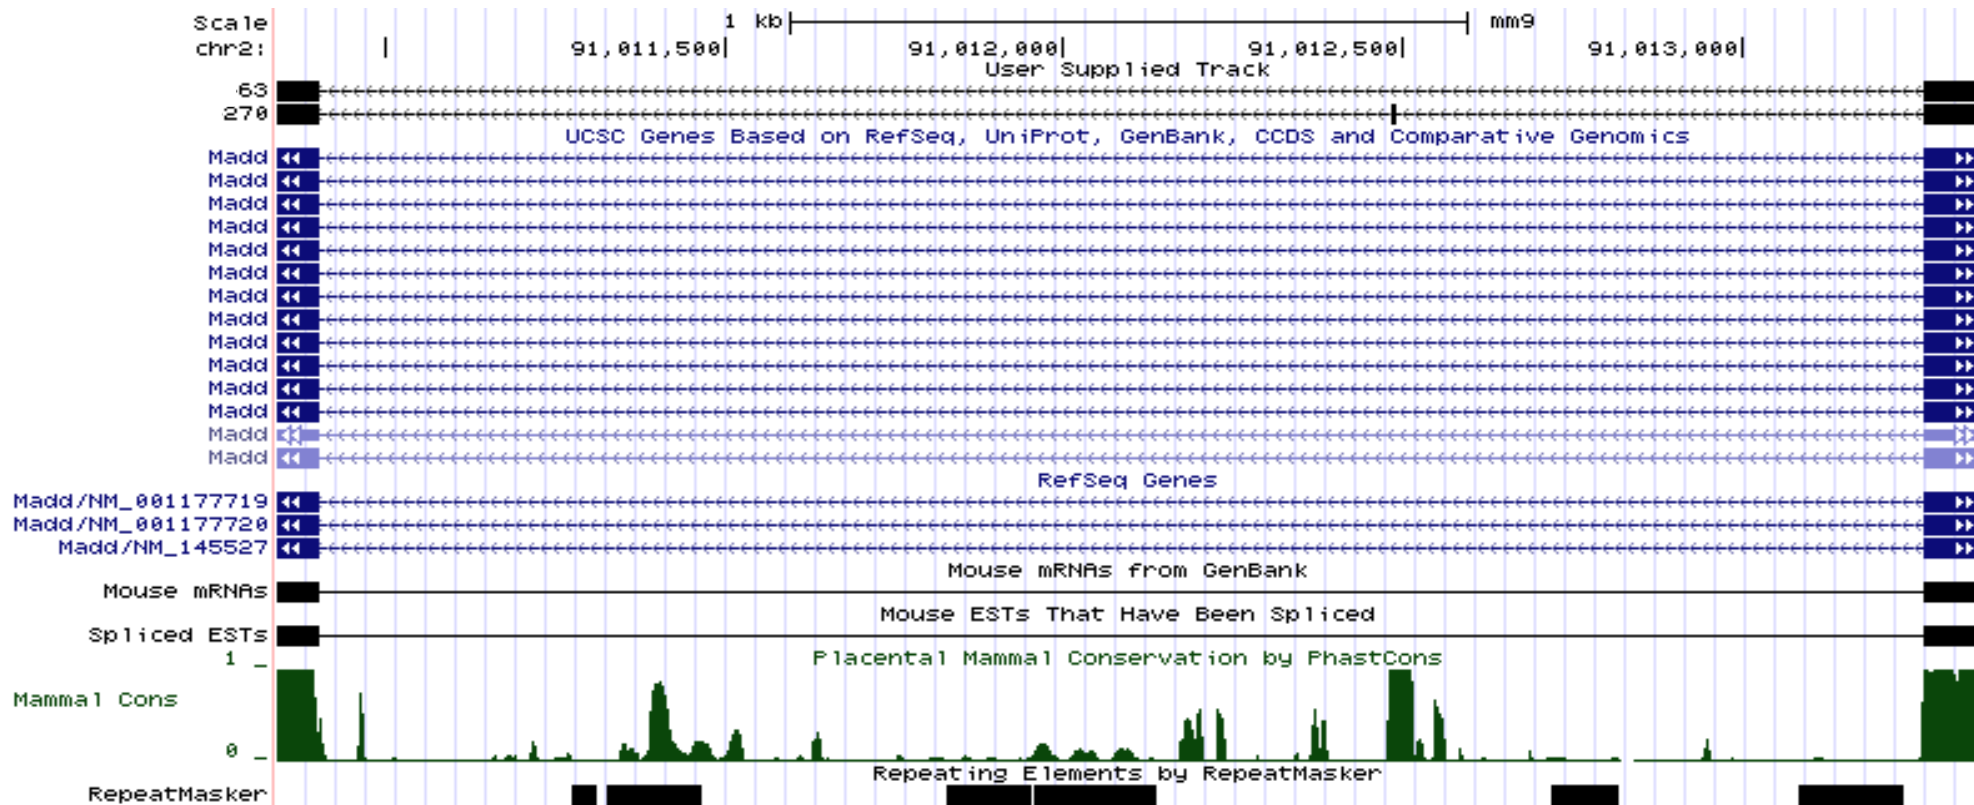

*Madd*

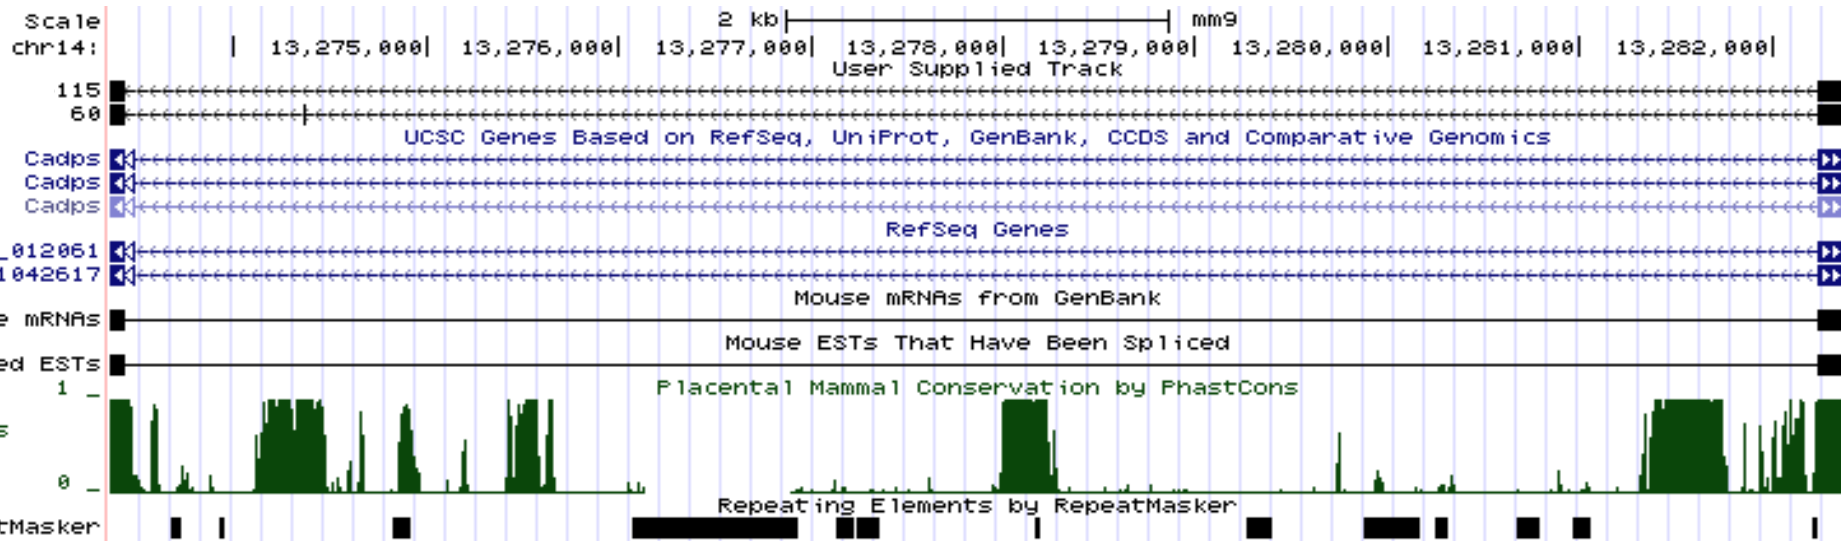

*Cadps*

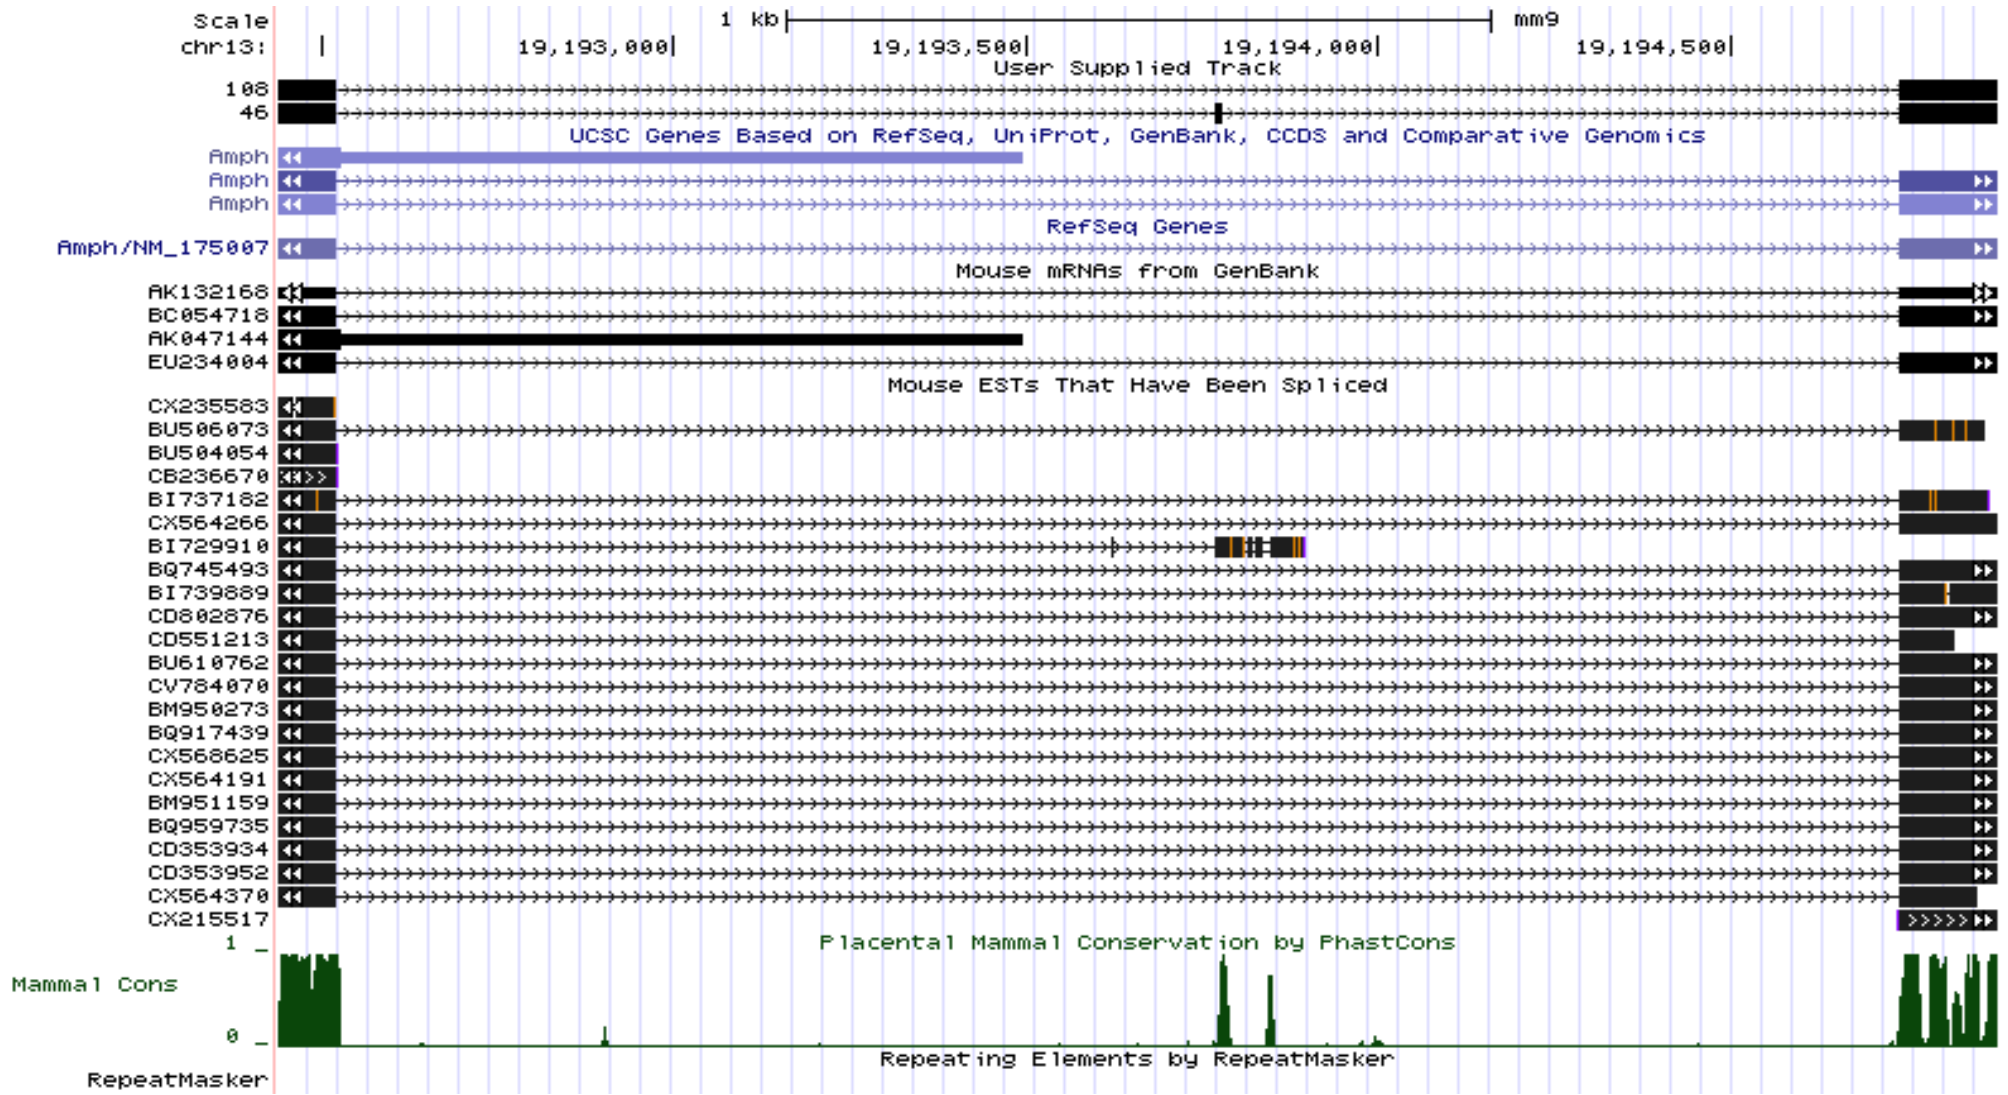

*Amph*

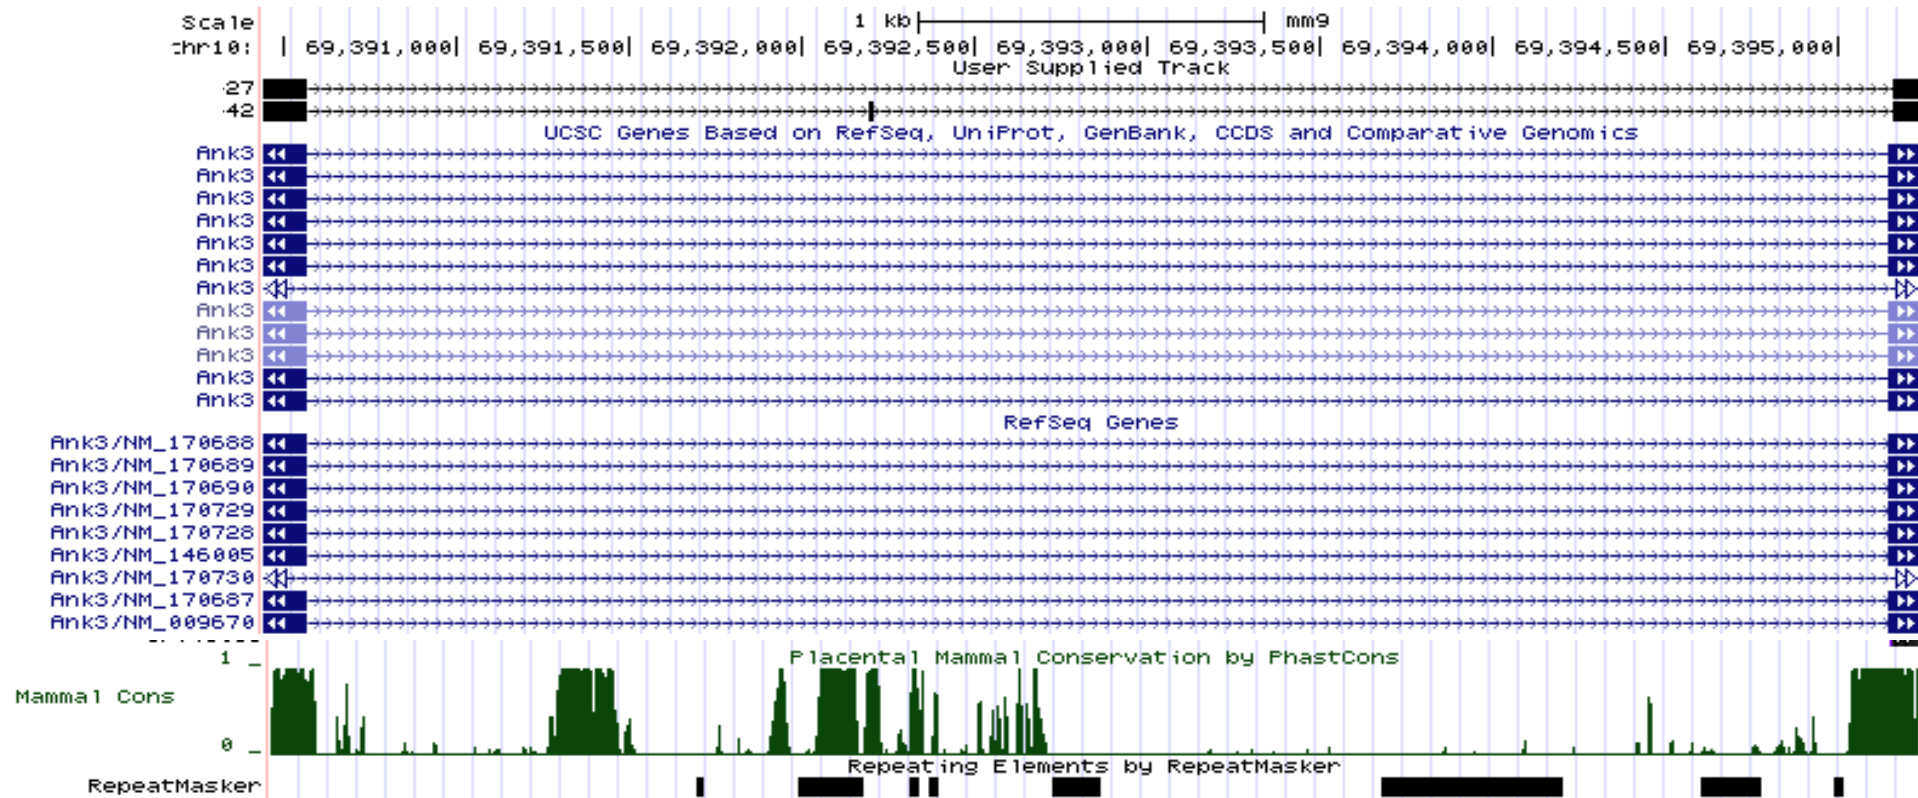

**Ank3**

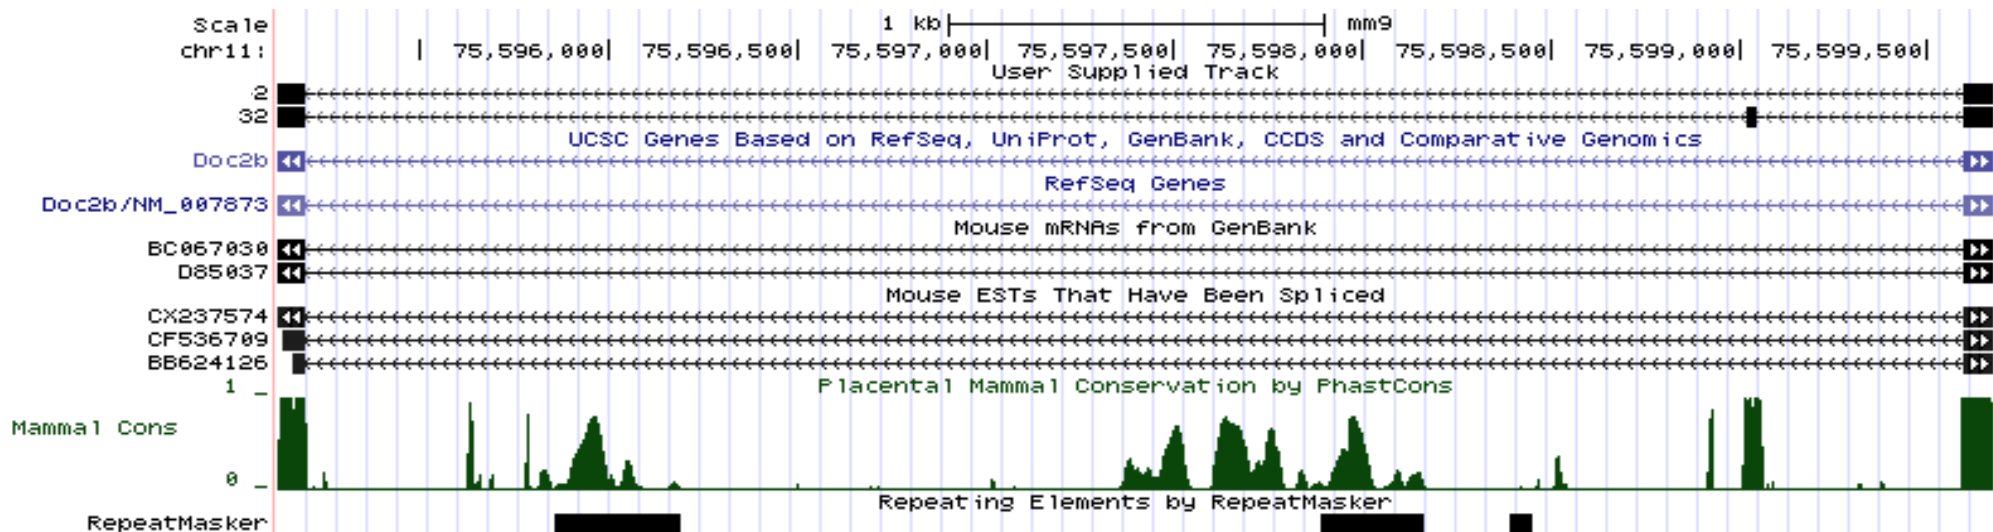

*Doc2b*

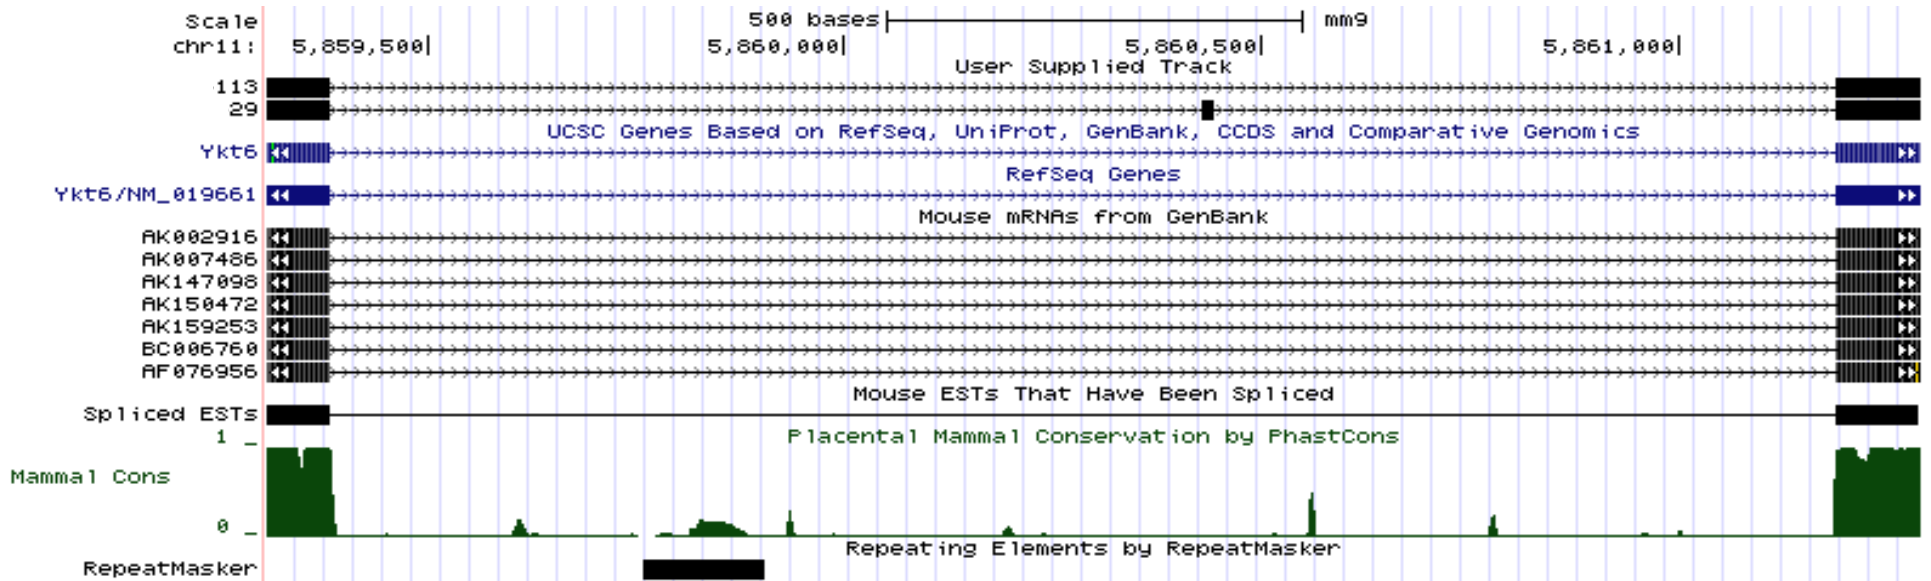

**Ykt6**



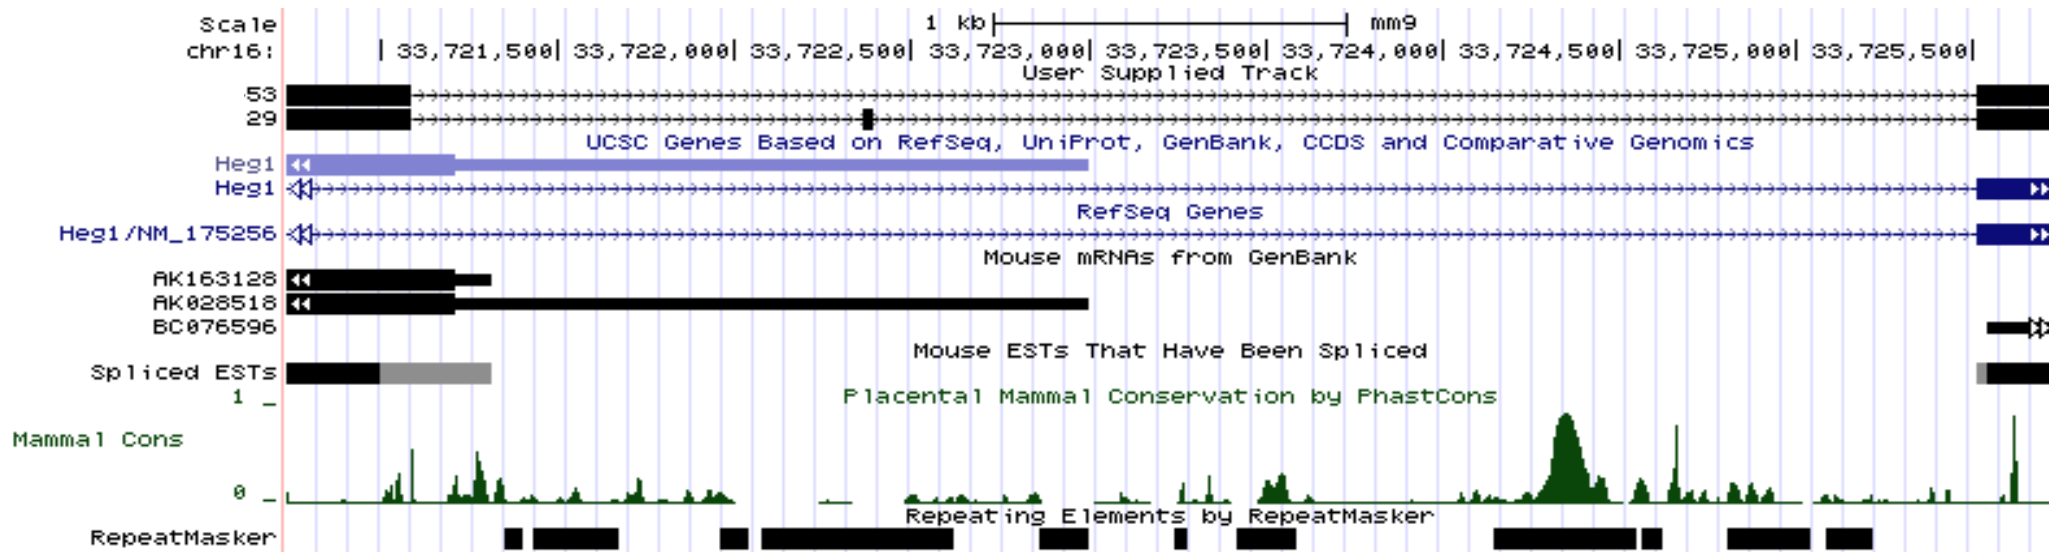

*Heg1*

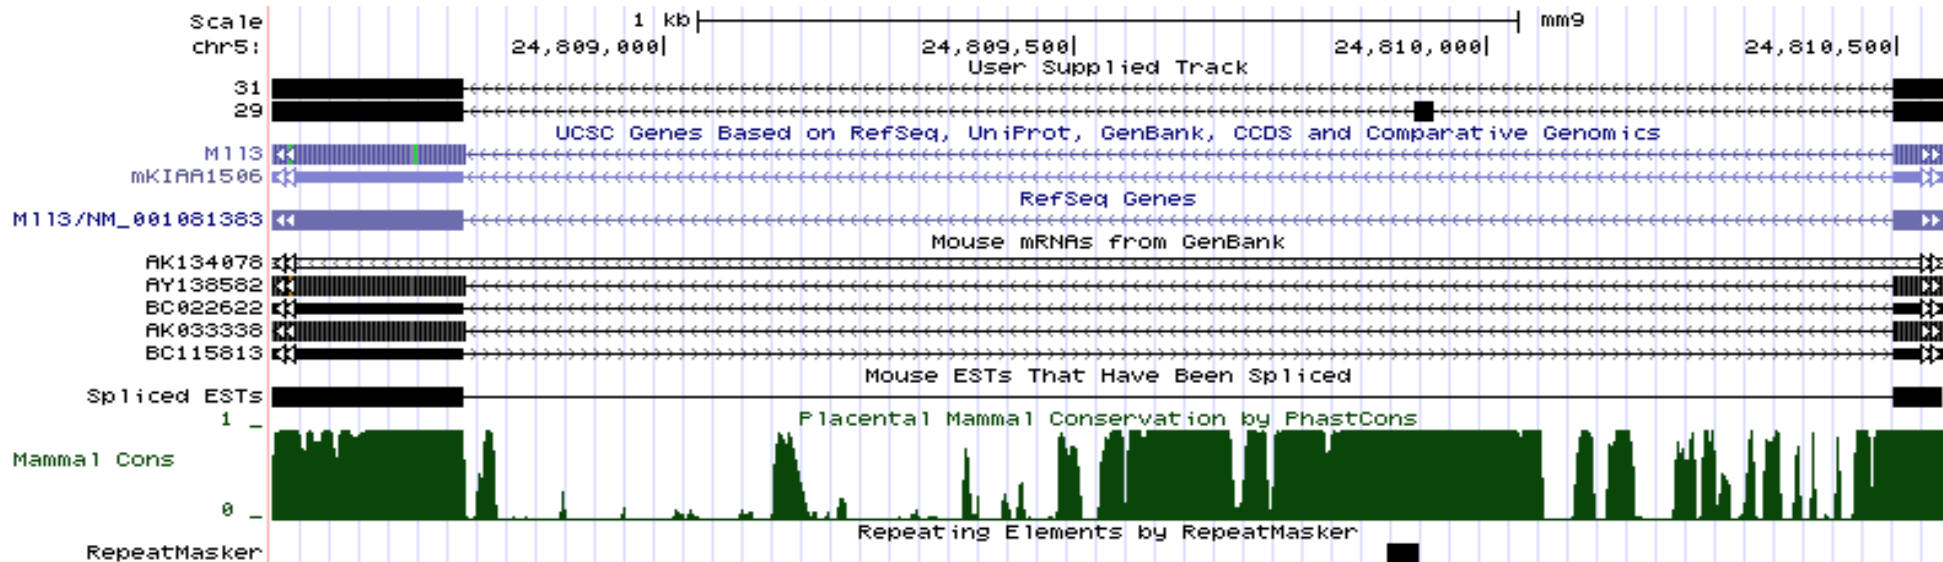

***M113***

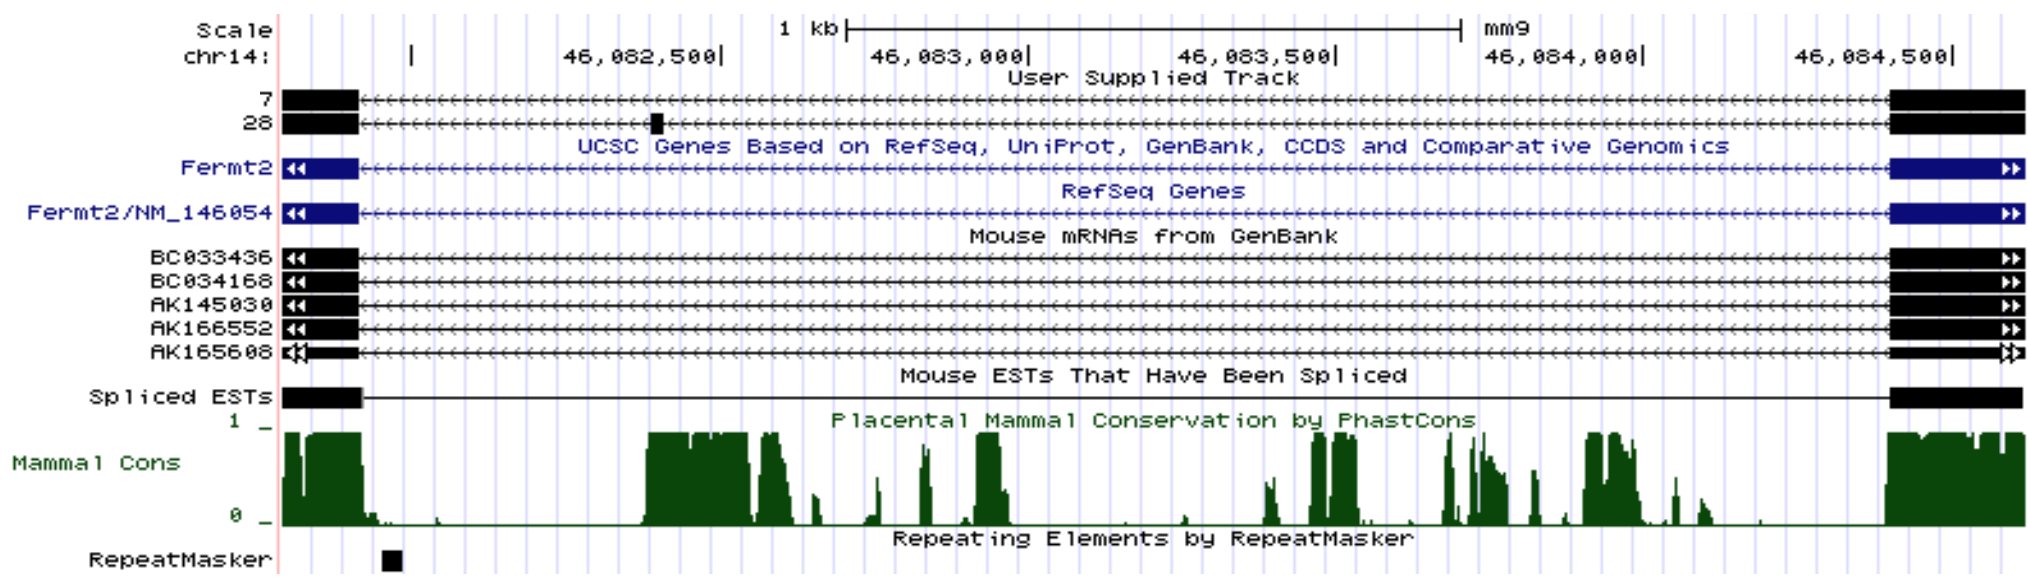

***Fermt2***

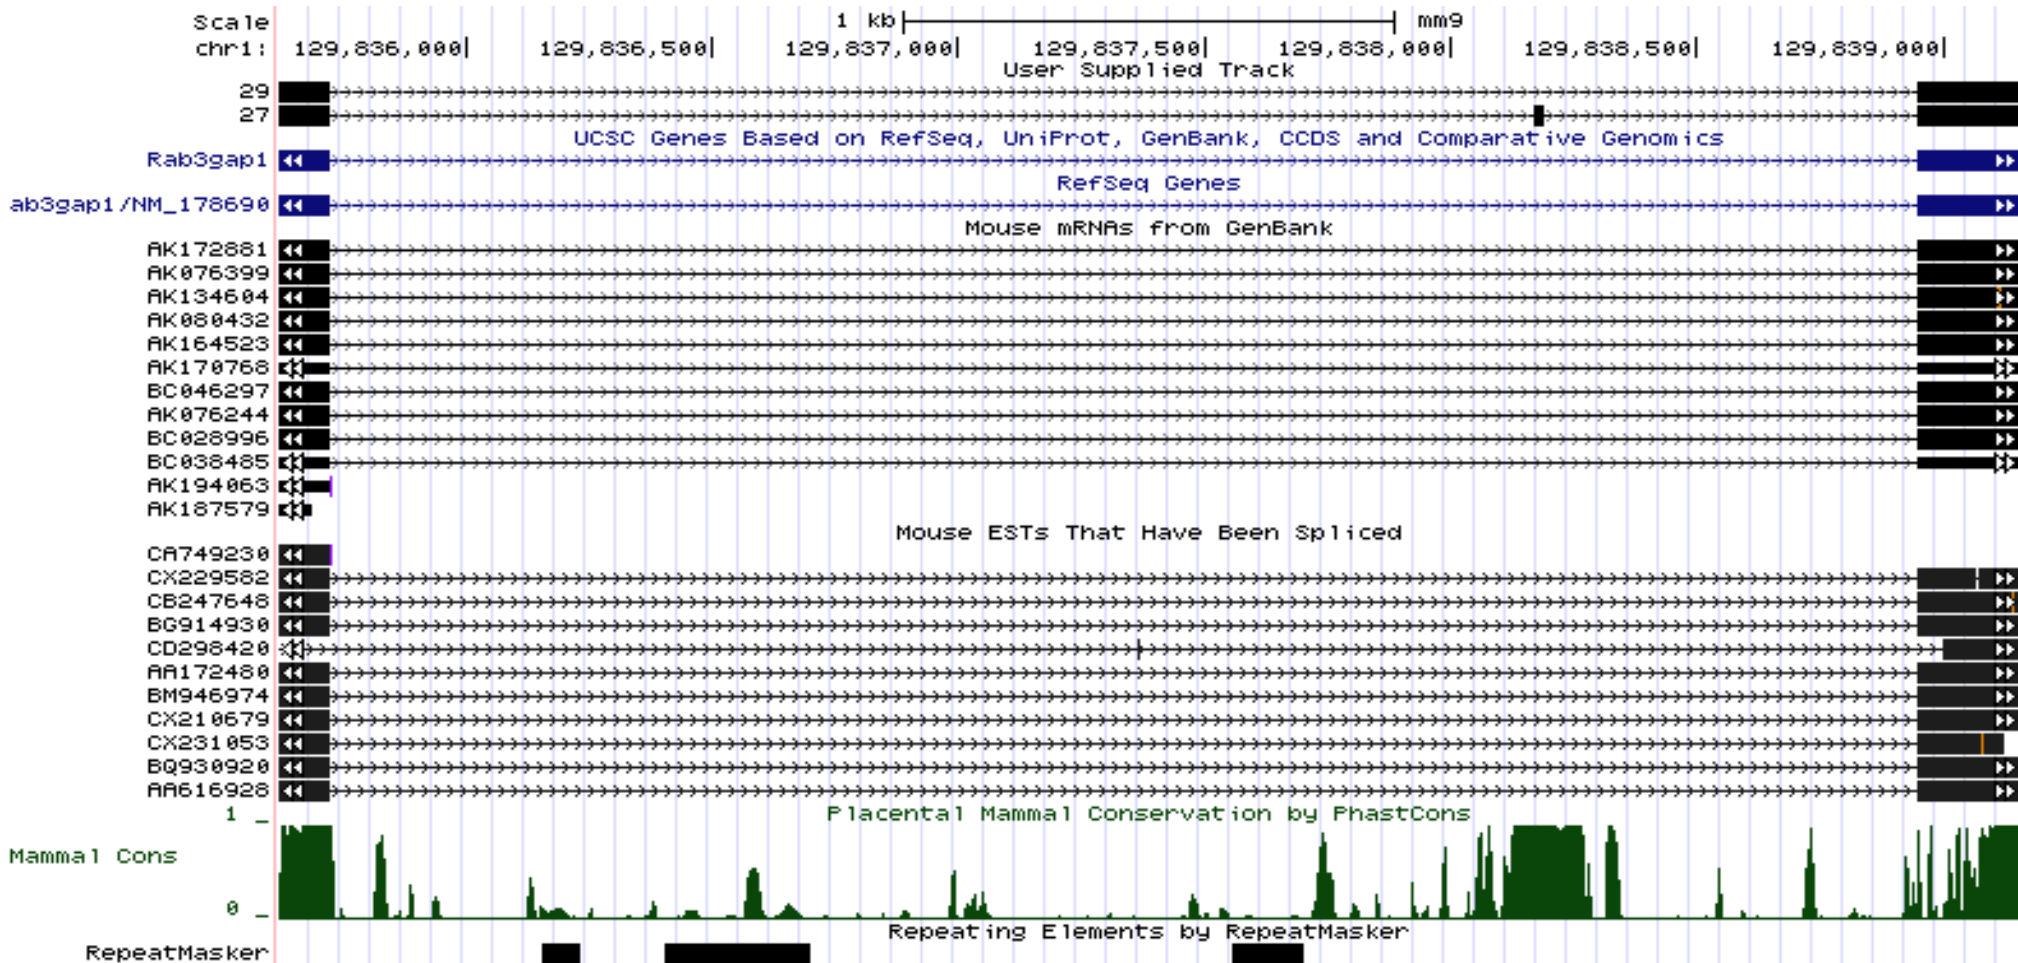

***Rab3gap1***

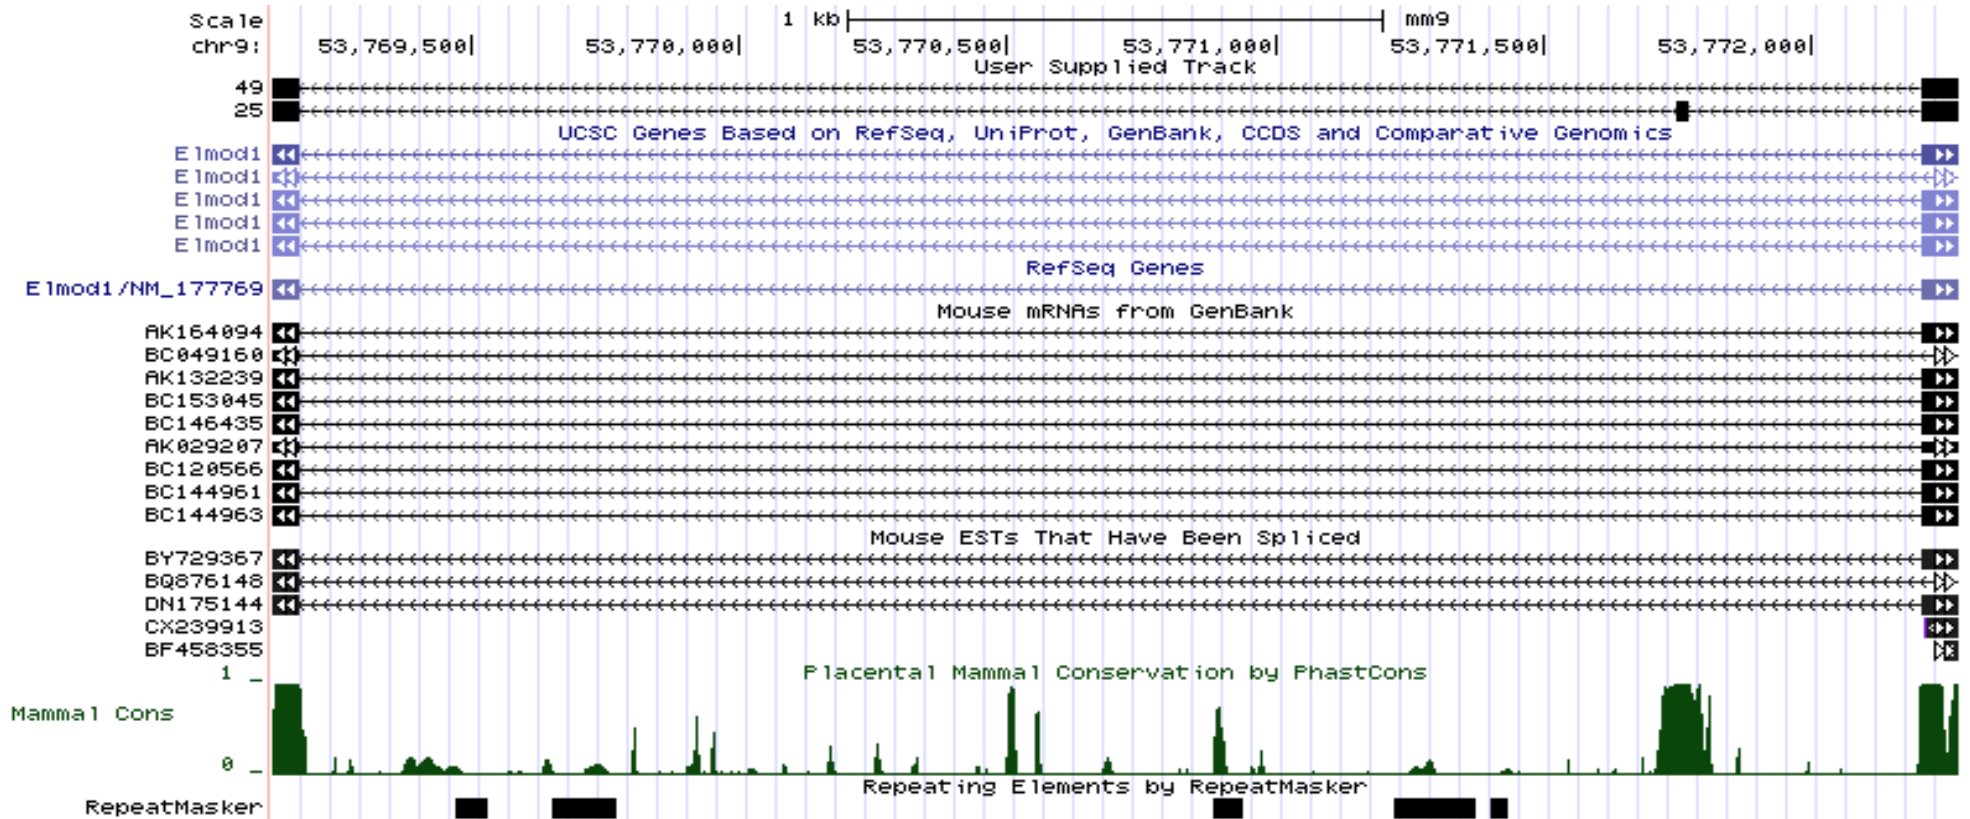

*Elmod1*

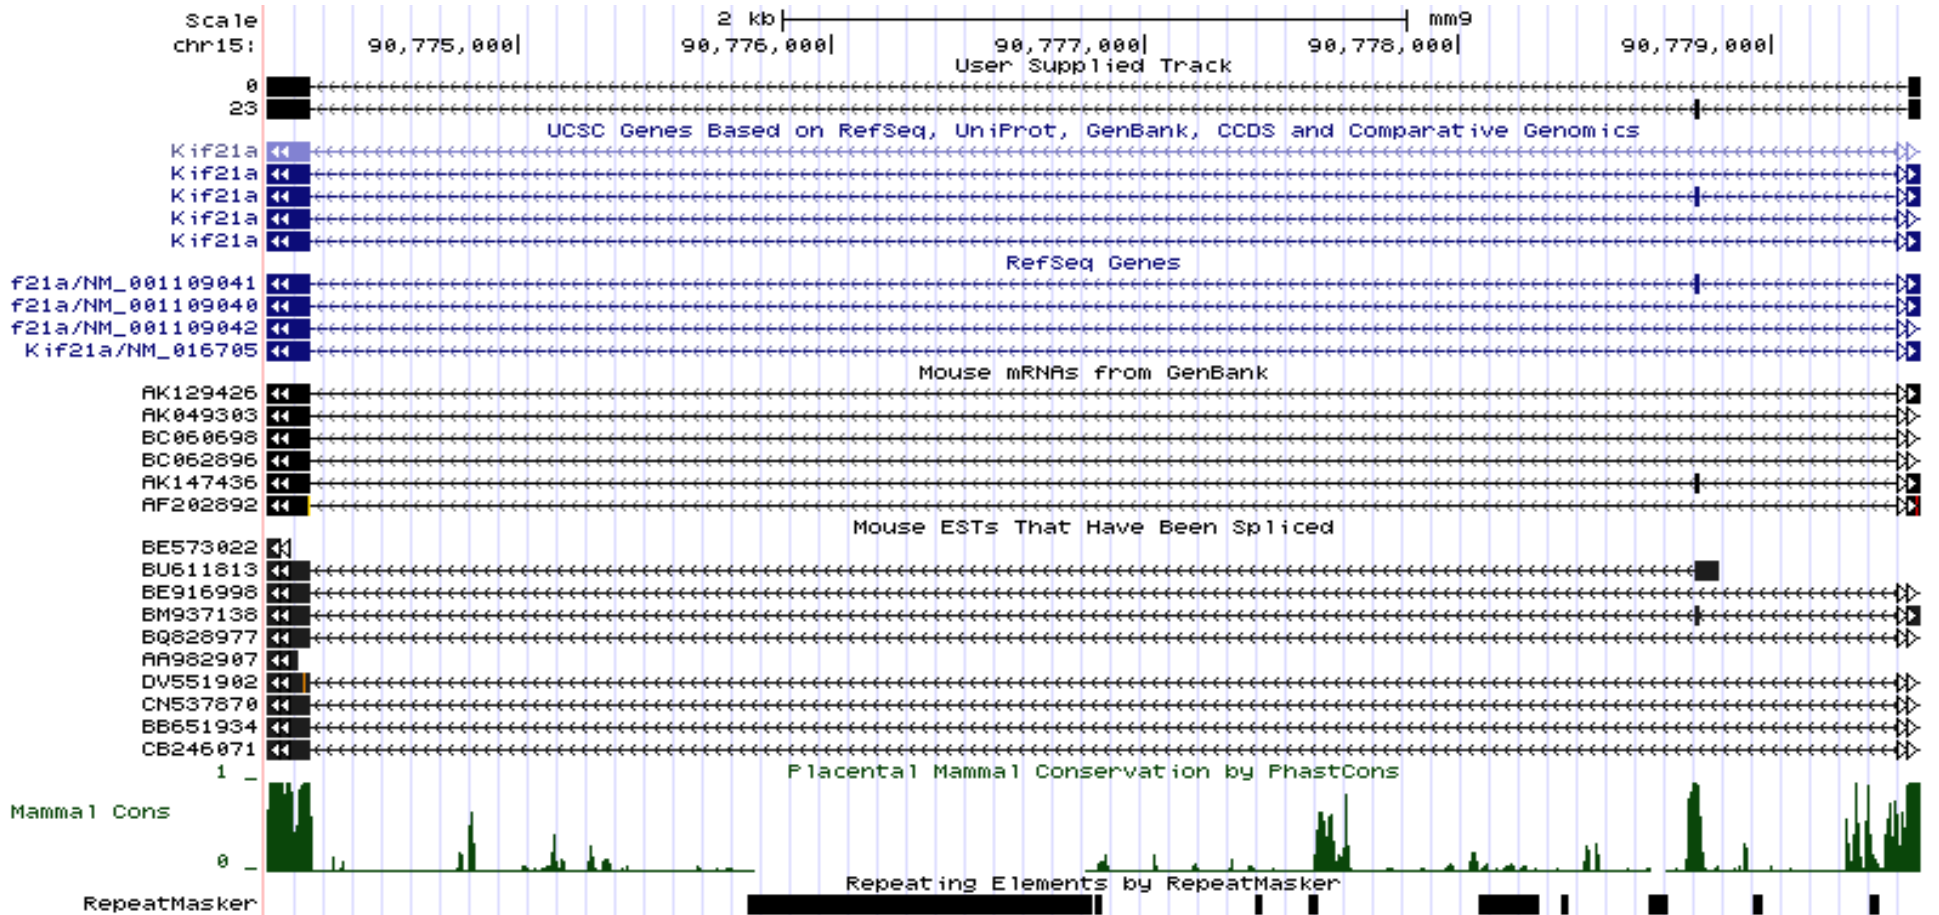

***Kif21a***

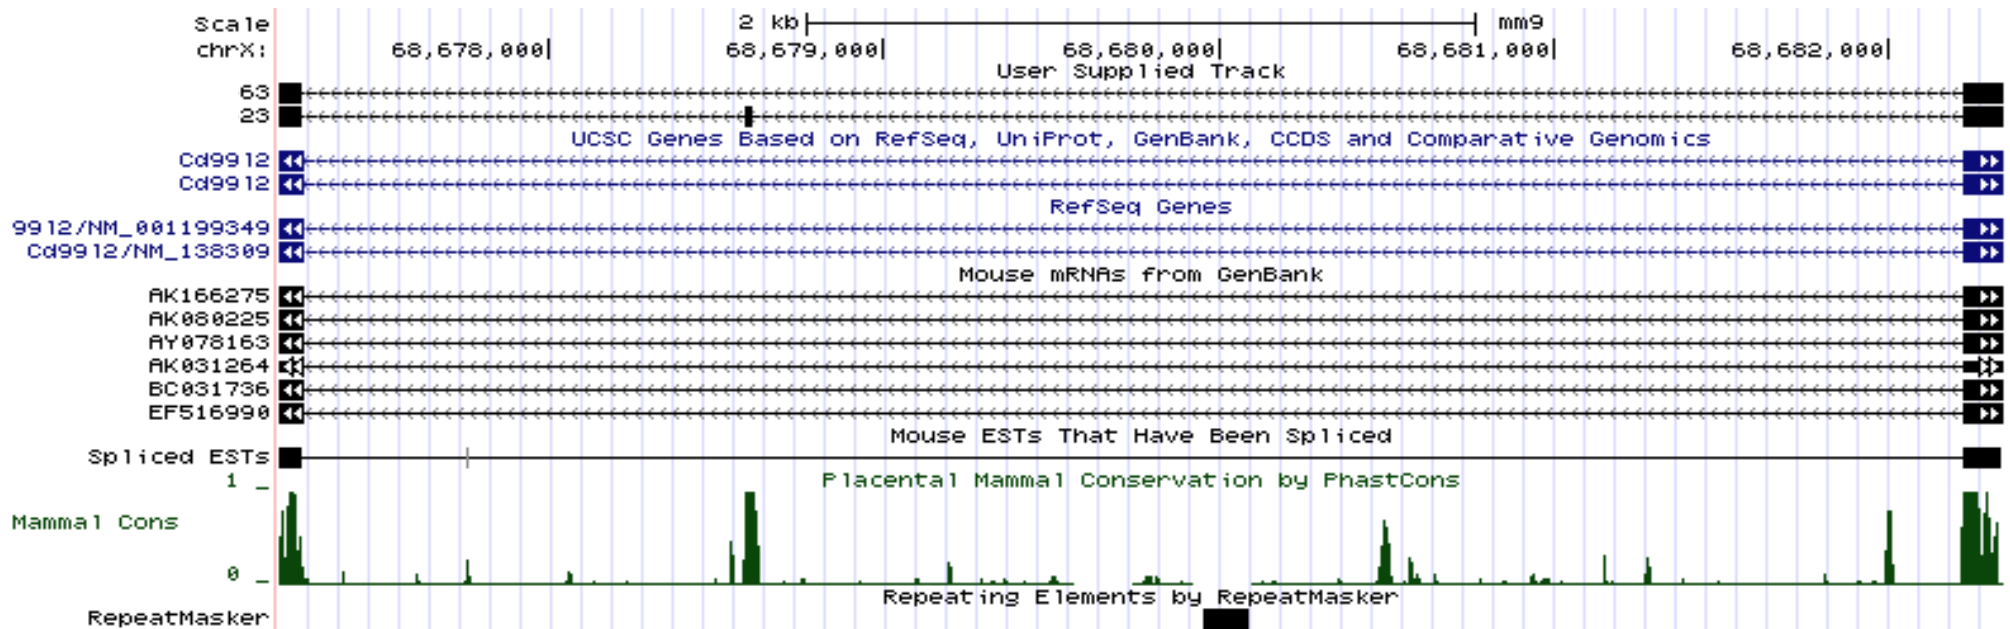

***Cd9912***

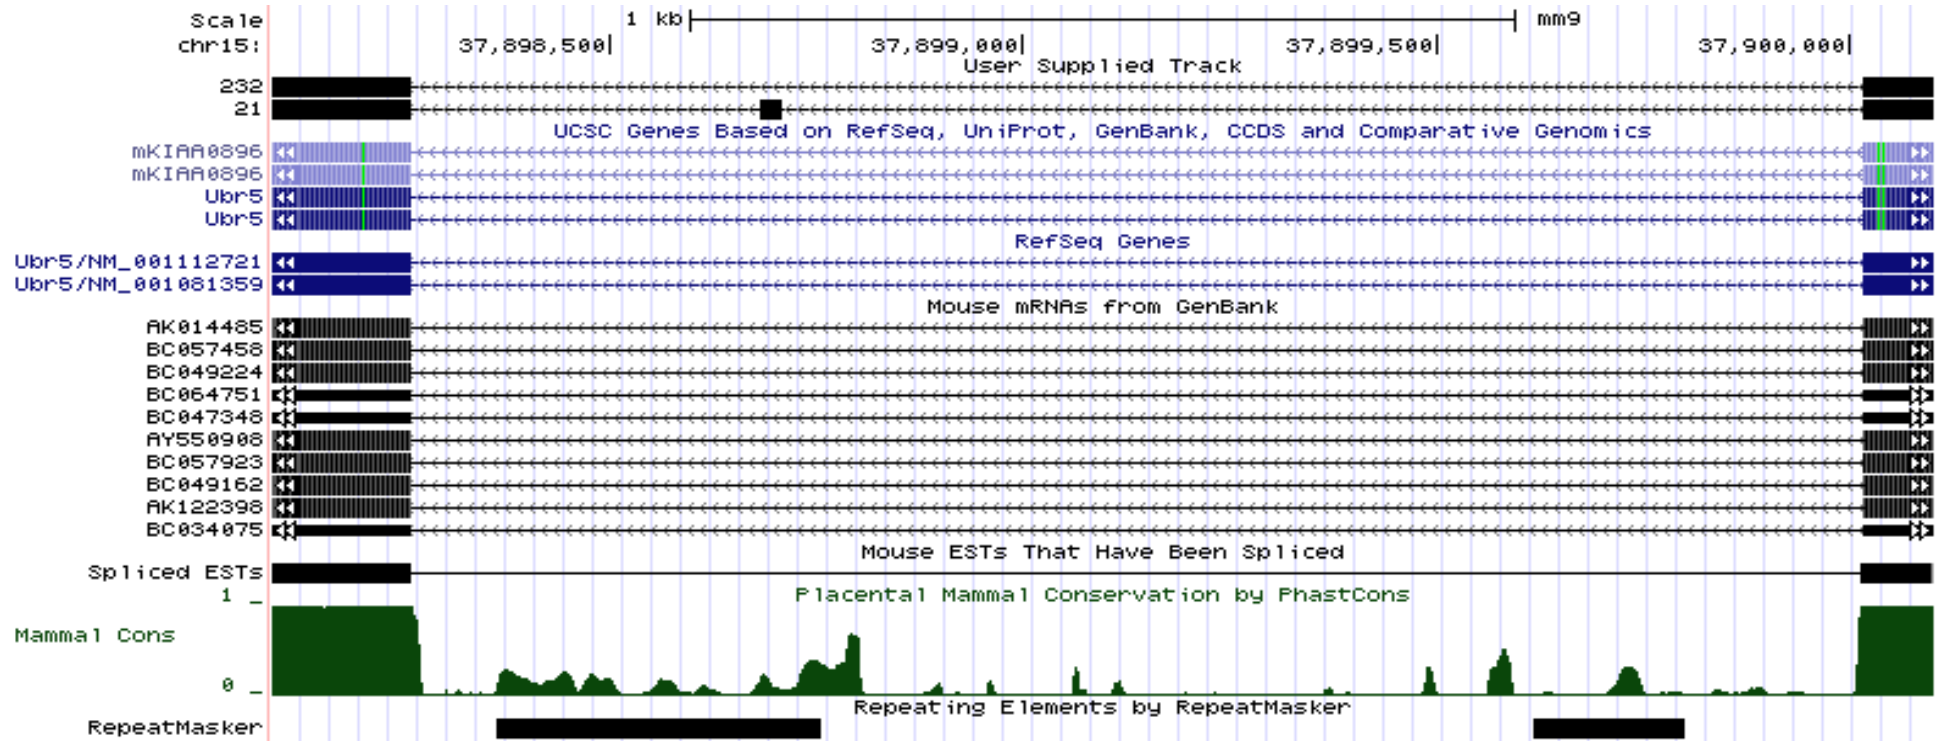

***Ubr5***



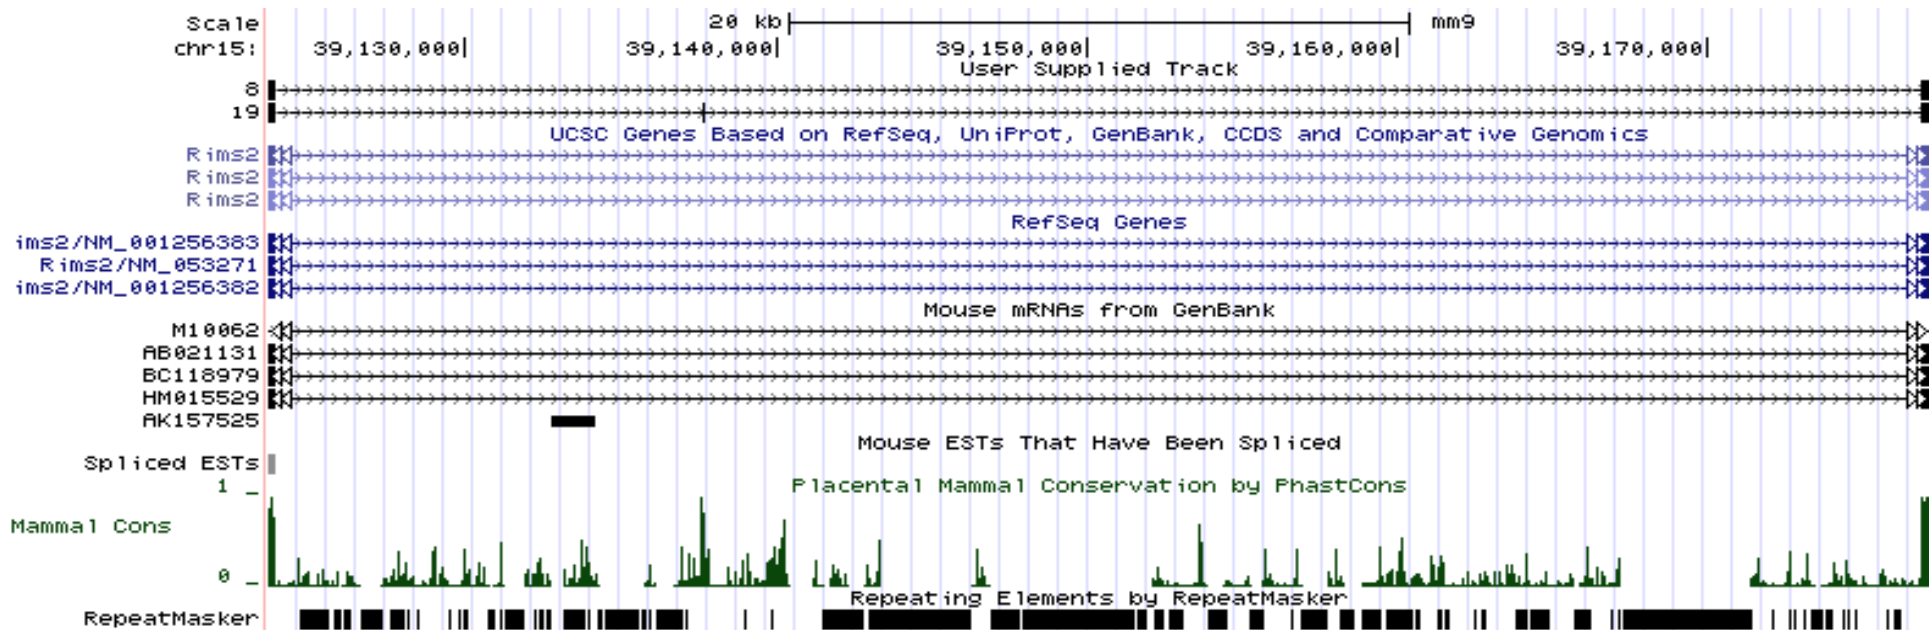

***Rims2***
